# Supplementary material for: Strength, power and aerobic capacity of transgender athletes: a cross-sectional study
Source: PubMed Central journal article supplement — Br J Sports Med. 2024 Apr 10;58(11):586–97. doi: 10.1136/bjsports-2023-108029 (PMC11137468; doi:10.1136/bjsports-2023-108029), 2024-04-10
Supplement: bjsports-2023-108029supp001.pdf [file bjsports-2023-108029supp001.pdf]

**Appendix. CHAMP: CHECKlist for statistical Assessment of Medical Papers**

|                                   |                                                                                                                                                                                                                |     |            |
|-----------------------------------|----------------------------------------------------------------------------------------------------------------------------------------------------------------------------------------------------------------|-----|------------|
| <b>Design and conduct</b>         |                                                                                                                                                                                                                |     |            |
| 1.                                | Clear description of the goal of research, study objective(s), study design, and study population                                                                                                              | Yes | Unclear No |
| 2.                                | Clear description of outcomes, exposures/treatments and covariates, and their measurement methods                                                                                                              | Yes | Unclear No |
| 3.                                | Validity of study design                                                                                                                                                                                       | Yes | Unclear No |
| 4.                                | Clear statement and justification of sample size                                                                                                                                                               | Yes | Unclear No |
| 5.                                | Clear declaration of design violations and acceptability of the design violations                                                                                                                              | Yes | Unclear No |
| 6.                                | Consistency between the paper and its previously published protocol                                                                                                                                            | Yes | Unclear No |
| <b>Data analysis</b>              |                                                                                                                                                                                                                |     |            |
| 7.                                | Correct and complete description of statistical methods                                                                                                                                                        | Yes | Unclear No |
| 8.                                | Valid statistical methods used and assumptions outlined                                                                                                                                                        | Yes | Unclear No |
| 9.                                | Appropriate assessment of treatment effect or interaction between treatment and another covariate                                                                                                              | Yes | Unclear No |
| 10.                               | Correct use of correlation and associational statistical testing                                                                                                                                               | Yes | Unclear No |
| 11.                               | Appropriate handling of continuous predictors                                                                                                                                                                  | Yes | Unclear No |
| 12.                               | Confidence intervals do not include impossible values                                                                                                                                                          | Yes | Unclear No |
| 13.                               | Appropriate comparison of baseline characteristics between the study arms in randomized trials                                                                                                                 | Yes | Unclear No |
| 14.                               | Correct assessment and adjustment of confounding                                                                                                                                                               | Yes | Unclear No |
| 15.                               | Avoiding model extrapolation not supported by data                                                                                                                                                             | Yes | Unclear No |
| 16.                               | Adequate handling of missing data                                                                                                                                                                              | Yes | Unclear No |
| <b>Reporting and presentation</b> |                                                                                                                                                                                                                |     |            |
| 17.                               | Adequate and correct description of the data                                                                                                                                                                   | Yes | Unclear No |
| 18.                               | Descriptive results provided as occurrence measures with confidence intervals, and analytic results provided as association measures and confidence intervals along with P-values                              | Yes | Unclear No |
| 19.                               | Confidence intervals provided for the contrast between groups rather than for each group                                                                                                                       | Yes | Unclear No |
| 20.                               | Avoiding selective reporting of analyses and P-hacking                                                                                                                                                         | Yes | Unclear No |
| 21.                               | Appropriate and consistent numerical precisions for effect sizes, test statistics, and P-values, and reporting the P-values rather their range                                                                 | Yes | Unclear No |
| 22.                               | Providing sufficient numerical results that could be included in a subsequent meta-analysis                                                                                                                    | Yes | Unclear No |
| 23.                               | Acceptable presentation of the figures and tables                                                                                                                                                              | Yes | Unclear No |
| <b>Interpretation</b>             |                                                                                                                                                                                                                |     |            |
| 24.                               | Interpreting the results based on association measures and 95% confidence intervals along with P-values, and correctly interpreting large P-values as indecisive results, not evidence of absence of an effect | Yes | Unclear No |
| 25.                               | Using confidence intervals rather than post-hoc power analysis for interpreting the results of studies                                                                                                         | Yes | Unclear No |
| 26.                               | Correctly interpreting occurrence or association measures                                                                                                                                                      | Yes | Unclear No |
| 27.                               | Distinguishing causation from association and correlation                                                                                                                                                      | Yes | Unclear No |
| 28.                               | Results of pre-specified analyses are distinguished from the results of exploratory analyses in the interpretation                                                                                             | Yes | Unclear No |
| 29.                               | Appropriate discussion of the study methodological limitations                                                                                                                                                 | Yes | Unclear No |
| 30.                               | Drawing only conclusions supported by the statistical analysis and no generalization of the results to subjects outside the target population                                                                  | Yes | Unclear No |
