# Supplementary material for: Strength, power and aerobic capacity of transgender athletes: a cross-sectional study
Source: PubMed Central journal article supplement — Br J Sports Med. 2024 Apr 10;58(11):586–97. doi: 10.1136/bjsports-2023-108029 (PMC11137468; doi:10.1136/bjsports-2023-108029), 2024-04-10
Supplement: bjsports-2023-108029supp002.pdf [file bjsports-2023-108029supp002.pdf]

**Supplementary Table 1** Participant Characteristics

|                           | <b>Cisgender<br/>Men<br/>(n = 19)</b> | <b>Transgender<br/>Men<br/>(n = 12)</b> | <b>Cisgender<br/>Women<br/>(n = 21)</b> | <b>Transgender<br/>Women<br/>(n = 23)</b> |
|---------------------------|---------------------------------------|-----------------------------------------|-----------------------------------------|-------------------------------------------|
| Age (yrs.)                | 37 ± 9                                | 34 ± 7                                  | 30 ± 9                                  | 34 ± 10                                   |
| Training Intensity        | 7 [IQR 2]                             | 7 [IQR 2]                               | 7 [IQR 2]                               | 7 [IQR 2]                                 |
| Length of GAHT (yrs.)     | -                                     | 4 ± 5                                   | -                                       | 6 ± 4                                     |
| Height (m)                | 1.8 ± 0.1 <sup>\$</sup>               | 1.7 ± 0.1 <sup>*#</sup>                 | 1.6 ± 0.1                               | 1.8 ± 0.1 <sup>\$</sup>                   |
| Clothed mass (kg)         | 76.4 ± 7.7 <sup>\$</sup>              | 73.1 ± 12.1                             | 60.6 ± 6.6                              | 83.9 ± 19.9 <sup>\$</sup>                 |
| BMI (kg•m <sup>-2</sup> ) | 23.6 ± 1.8                            | 25.7 ± 3.9                              | 22.5 ± 1.9                              | 26.2 ± 6.0 <sup>\$</sup>                  |

Data represents Mean ± Standard Deviation, or Median [Inter Quartile Range]. \*denotes significantly different from Cisgender Men; \$ denotes significantly different from Cisgender Women. # denotes significantly different from Transgender Women; yrs., years; m, metres; kg, kilogram; kg•m<sup>-2</sup>, kilograms per metre squared.
